# Supplementary material for: Carbon dots with positive surface charge from tartaric acid and m-aminophenol for selective killing of Gram-positive bacteria
Source: Royal Society of Chemistry journal article supplement (doi:10.1039/d0tb02332a), 2020-11-03
Supplement: d0tb02332a1.pdf [file d0tb02332a1.pdf]

## Carbon dot with positive surface charge from tartaric acid and m-aminophenol for selective killing Gram-positive bacteria

### Supporting Information

Huibo Wang,<sup>a,b,s</sup> Fang Lu,<sup>a,s,\*</sup> Chongqing Ma,<sup>b</sup> Yurong Ma,<sup>b</sup> Mengling Zhang,<sup>b</sup> Bo Wang,<sup>b</sup> Yue Zhang,<sup>a</sup> Yang Liu,<sup>b,\*</sup> Hui Huang,<sup>b,\*</sup> Zhenhui Kang<sup>b</sup>

<sup>a</sup>*School of Life Sciences, Beijing University of Chinese Medicine, Beijing, 100029, China.*

<sup>b</sup>*Institute of Functional Nano & Soft Materials (FUNSOM), Jiangsu Key Laboratory for Carbon-Based Functional Materials & Devices, Soochow University, 199 Ren'ai Road, Suzhou, 215123, Jiangsu, PR China.*

E-mail: lufang@bucm.edu.cn, yangl@suda.edu.cn, hhuang0618@suda.edu.cn.

H.B. Wang and F. Lu contributed equally to this work.

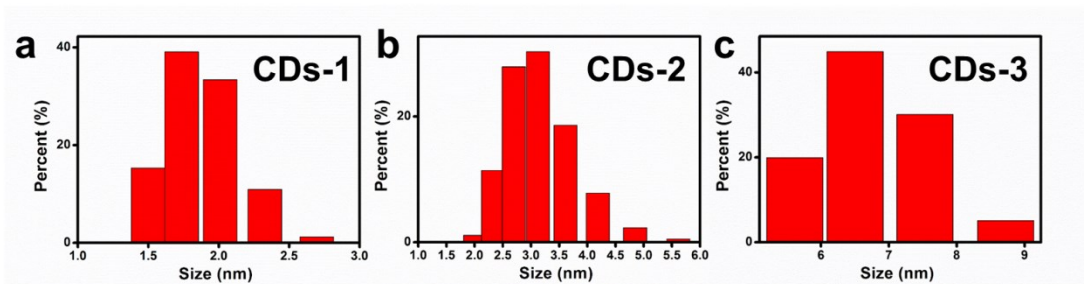

**Fig. S1** Size distributions of CDs-1 (a), CDs-2 (b) and CDs-3 (c).

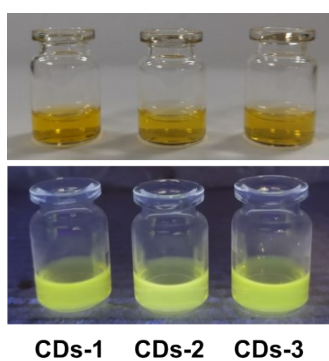

**Fig. S2** Photographs of CDs-1, CDs-2 and CDs-3 under daylight and ultraviolet lamp (365 nm), respectively.

| Atomic ratio (%) | CDs-1        | CDs-2        | CDs-3        |
|------------------|--------------|--------------|--------------|
| <b>C</b>         | <b>56.66</b> | <b>60.12</b> | <b>65.01</b> |
| <b>N</b>         | <b>7.08</b>  | <b>6.56</b>  | <b>6.01</b>  |
| <b>O</b>         | <b>36.26</b> | <b>33.33</b> | <b>28.98</b> |

**Table 1.** Atom ratio of three elements involving carbon, nitrogen and oxygen in CDs-1, CDs-2 and CDs-3.

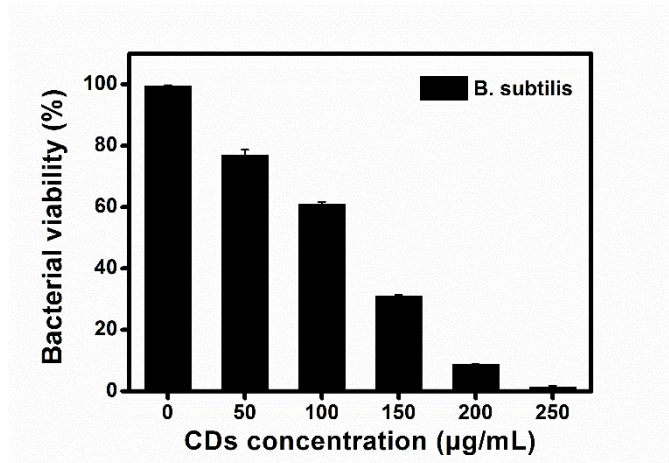

Fig. S3 Bacterial viability of *B. subtilis* treated with different concentrations of CDs-3.

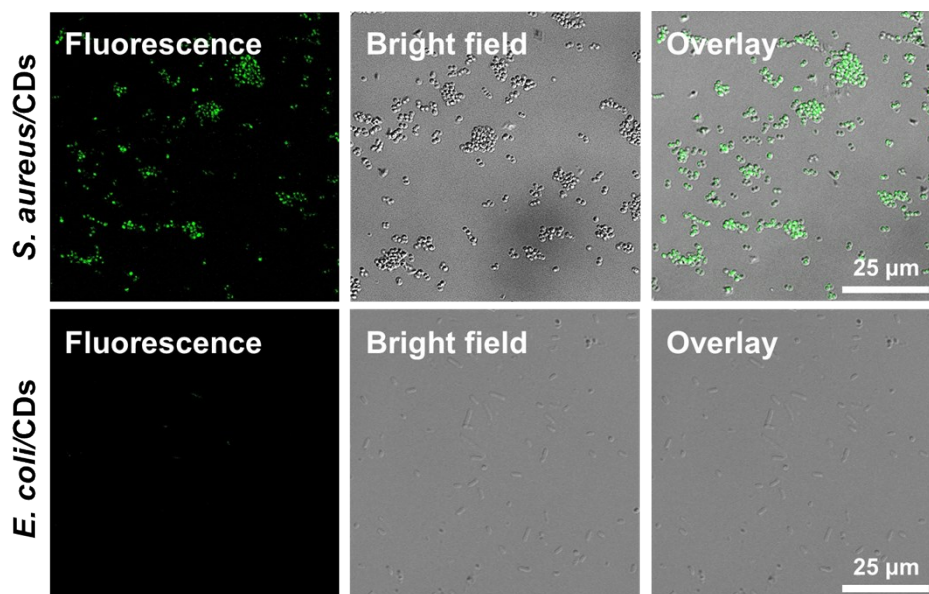

Fig. S4 Confocal images of *S. aureus* and *E. coli* incubated with CDs-3.
